# Supplementary material
Source: PubMed Central journal article supplement (PMC3997584)
Supplement: supp_jit807_jit807supp_table1.pdf [file supp_jit807_jit807supp_table1.pdf]

**Table S1. Description of SNPs included in analysis.**

| SNP        | Position  | Gene  | Ref. allele (A1) | SNP (A2) | Number of participants with call | Call rate | Genotype frequencies |      |      | SNP position on cds | Amino acid position | Amino acid change | Candidate |
|------------|-----------|-------|------------------|----------|----------------------------------|-----------|----------------------|------|------|---------------------|---------------------|-------------------|-----------|
|            |           |       |                  |          |                                  |           | A1A1                 | A1A2 | A2A2 |                     |                     |                   |           |
| rs179008   | 12813579  | TLR7  | A                | T        | 845                              | 1.00      | 708                  | 80   | 57   | 32                  | 11 Q>L              | Y                 |           |
| rs352140   | 52231736  | TLR9  | C                | T        | 846                              | 1.00      | 401                  | 358  | 87   | 1635                | 545 P>P             | Y                 |           |
| rs3764879  | 12834617  | TLR8  | C                | G        | 843                              | 1.00      | 490                  | 178  | 175  |                     |                     | Y                 |           |
| rs3764880  | 12834746  | TLR8  | A                | G        | 846                              | 1.00      | 489                  | 181  | 176  | 1                   | 1 M>V               | Y                 |           |
| rs3804099  | 154844105 | TLR2  | C                | T        | 846                              | 1.00      | 423                  | 342  | 81   | 597                 | 199 N>N             | Y                 |           |
| rs3804100  | 154844858 | TLR2  | T                | C        | 847                              | 1.00      | 763                  | 81   | 3    | 1350                | 450 S>S             | Y                 |           |
| rs4986791  | 119515422 | TLR4  | C                | T        | 844                              | 1.00      | 825                  | 19   | 0    | 1196                | 399 T>I             | Y                 |           |
| rs5743704  | 154845400 | TLR2  | C                | A        | 13                               | 0.02      | 8                    | 5    | 0    | 1892                | 631 P>H             | Y                 |           |
| rs10025405 | 187243799 | TLR3  | A                | G        | 820                              | 0.97      | 461                  | 302  | 57   |                     |                     | N                 |           |
| rs1013150  | 12842361  | TLR8  | G                | A        | 844                              | 1.00      | 380                  | 204  | 260  |                     |                     | N                 |           |
| rs10818073 | 119507396 | TLR4  | C                | T        | 844                              | 1.00      | 825                  | 19   | 0    |                     |                     | N                 |           |
| rs10893493 | 125657856 | TIRAP | A                | G        | 844                              | 1.00      | 630                  | 198  | 16   |                     |                     | N                 |           |
| rs10983756 | 119513000 | TLR4  | C                | T        | 846                              | 1.00      | 695                  | 146  | 5    |                     |                     | N                 |           |
| rs11536865 | 119505843 | TLR4  | G                | C        | 842                              | 0.99      | 635                  | 192  | 15   |                     |                     | N                 |           |
| rs11536887 | 119517494 | TLR4  | A                | G        | 845                              | 1.00      | 759                  | 83   | 3    |                     |                     | N                 |           |
| rs11536888 | 119517609 | TLR4  | C                | T        | 844                              | 1.00      | 762                  | 79   | 3    |                     |                     | N                 |           |
| rs11536892 | 119519302 | TLR4  | G                | A        | 847                              | 1.00      | 795                  | 51   | 1    |                     |                     | N                 |           |
| rs11536893 | 119519372 | TLR4  | G                | A        | 846                              | 1.00      | 796                  | 49   | 1    |                     |                     | N                 |           |
| rs11536897 | 119519830 | TLR4  | G                | A        | 847                              | 1.00      | 752                  | 90   | 5    |                     |                     | N                 |           |
| rs11721827 | 187228130 | TLR3  | A                | C        | 847                              | 1.00      | 742                  | 101  | 4    |                     |                     | N                 |           |
| rs13126816 | 187231171 | TLR3  | G                | A        | 846                              | 1.00      | 721                  | 122  | 3    |                     |                     | N                 |           |
| rs1548731  | 12837867  | TLR8  | T                | C        | 771                              | 0.91      | 354                  | 166  | 251  |                     |                     | N                 |           |
| rs1620233  | 12807936  | TLR7  | T                | C        | 844                              | 1.00      | 335                  | 216  | 293  |                     |                     | N                 |           |
| rs1634319  | 12812955  | TLR7  | T                | C        | 847                              | 1.00      | 521                  | 179  | 147  |                     |                     | N                 |           |
| rs1634320  | 12806941  | TLR7  | C                | T        | 847                              | 1.00      | 828                  | 9    | 10   |                     |                     | N                 |           |
| rs1634321  | 12805245  | TLR7  | A                | T        | 842                              | 0.99      | 565                  | 160  | 117  |                     |                     | N                 |           |
| rs1634322  | 12799947  | TLR7  | T                | A        | 845                              | 1.00      | 527                  | 179  | 139  |                     |                     | N                 |           |
| rs1634323  | 12798047  | TLR7  | A                | G        | 846                              | 1.00      | 679                  | 98   | 69   |                     |                     | N                 |           |
| rs1638596  | 12806030  | TLR7  | T                | C        | 845                              | 1.00      | 776                  | 42   | 27   |                     |                     | N                 |           |
| rs17256081 | 12835965  | TLR8  | T                | C        | 847                              | 1.00      | 531                  | 168  | 148  |                     |                     | N                 |           |
| rs1731479  | 12800373  | TLR7  | C                | T        | 760                              | 0.90      | 506                  | 155  | 99   |                     |                     | N                 |           |
| rs1786704  | 125670966 | TIRAP | T                | C        | 845                              | 1.00      | 742                  | 98   | 5    |                     |                     | N                 |           |
| rs179009   | 12813400  | TLR7  | A                | G        | 844                              | 1.00      | 688                  | 94   | 62   |                     |                     | N                 |           |
| rs179010   | 12812805  | TLR7  | C                | T        | 842                              | 0.99      | 693                  | 85   | 64   |                     |                     | N                 |           |
| rs179011   | 12811880  | TLR7  | G                | T        | 847                              | 1.00      | 430                  | 220  | 197  |                     |                     | N                 |           |
| rs179012   | 12811482  | TLR7  | A                | G        | 845                              | 1.00      | 573                  | 152  | 120  |                     |                     | N                 |           |
| rs179013   | 12811391  | TLR7  | G                | A        | 845                              | 1.00      | 735                  | 69   | 41   |                     |                     | N                 |           |
| rs179016   | 12804362  | TLR7  | C                | G        | 844                              | 1.00      | 653                  | 111  | 80   |                     |                     | N                 |           |
| rs179018   | 12800070  | TLR7  | T                | C        | 846                              | 1.00      | 737                  | 73   | 36   |                     |                     | N                 |           |
| rs179021   | 12799683  | TLR7  | T                | G        | 846                              | 1.00      | 797                  | 29   | 20   |                     |                     | N                 |           |
| rs187084   | 52236070  | TWF2  | A                | G        | 846                              | 1.00      | 432                  | 336  | 78   |                     |                     | N                 |           |
| rs1893352  | 125665896 | TIRAP | A                | G        | 847                              | 1.00      | 645                  | 196  | 6    |                     |                     | N                 |           |
| rs1898830  | 154827902 | TLR2  | A                | G        | 844                              | 1.00      | 675                  | 157  | 12   |                     |                     | N                 |           |
| rs1927906  | 119519935 | TLR4  | T                | C        | 843                              | 1.00      | 280                  | 383  | 180  |                     |                     | N                 |           |
| rs1927907  | 119512584 | TLR4  | C                | T        | 773                              | 0.91      | 481                  | 260  | 32   |                     |                     | N                 |           |
| rs1927911  | 119509874 | TLR4  | A                | G        | 845                              | 1.00      | 343                  | 386  | 116  |                     |                     | N                 |           |
| rs1927912  | 119509246 | TLR4  | T                | C        | 847                              | 1.00      | 612                  | 218  | 17   |                     |                     | N                 |           |
| rs2109134  | 12837106  | TLR8  | A                | T        | 845                              | 1.00      | 680                  | 92   | 73   |                     |                     | N                 |           |
| rs2149356  | 119514019 | TLR4  | T                | G        | 846                              | 1.00      | 530                  | 287  | 29   |                     |                     | N                 |           |
| rs2159377  | 12847433  | TLR8  | C                | T        | 840                              | 0.99      | 639                  | 120  | 81   | 354                 | 118 D>D             | N                 |           |
| rs2770146  | 119513158 | TLR4  | T                | C        | 846                              | 1.00      | 613                  | 217  | 16   |                     |                     | N                 |           |
| rs3747414  | 12849332  | TLR8  | C                | A        | 846                              | 1.00      | 403                  | 205  | 238  | 2253                | 751 I>I             | N                 |           |
| rs3775292  | 187240018 | TLR3  | G                | C        | 845                              | 1.00      | 681                  | 150  | 14   |                     |                     | N                 |           |
| rs3775296  | 187234760 | TLR3  | C                | A        | 843                              | 1.00      | 602                  | 220  | 21   |                     |                     | N                 |           |
| rs3802813  | 125667677 | TIRAP | G                | A        | 844                              | 1.00      | 756                  | 86   | 2    | 164                 | 55 S>N              | N                 |           |
| rs4235232  | 154837533 | TLR2  | T                | G        | 847                              | 1.00      | 659                  | 174  | 14   |                     |                     | N                 |           |
| rs4696483  | 154838704 | TLR2  | C                | T        | 844                              | 1.00      | 249                  | 409  | 186  |                     |                     | N                 |           |
| rs4830805  | 12837679  | TLR8  | G                | A        | 847                              | 1.00      | 568                  | 145  | 134  |                     |                     | N                 |           |
| rs4830806  | 12841892  | TLR8  | T                | C        | 846                              | 1.00      | 426                  | 197  | 223  |                     |                     | N                 |           |

| SNP       | Position  | Gene  | Ref. allele (A1) | SNP (A2) | Number of participants with call | Call rate | Genotype frequencies |      |      | SNP position on cds | Amino acid position | Amino acid change | Candidate |
|-----------|-----------|-------|------------------|----------|----------------------------------|-----------|----------------------|------|------|---------------------|---------------------|-------------------|-----------|
|           |           |       |                  |          |                                  |           | A1A1                 | A1A2 | A2A2 |                     |                     |                   |           |
| rs4830808 | 12842254  | TLR8  | C                | T        | 842                              | 0.99      | 730                  | 66   | 46   |                     |                     | N                 |           |
| rs4988453 | 38154257  | ACAA1 | C                | A        | 846                              | 1.00      | 668                  | 164  | 14   |                     |                     | N                 |           |
| rs4988457 | 38157139  | MYD88 | C                | G        | 846                              | 1.00      | 669                  | 164  | 13   |                     |                     | N                 |           |
| rs5030710 | 119514541 | TLR4  | T                | C        | 844                              | 1.00      | 548                  | 267  | 29   | 315                 | 105 S>S             | N                 |           |
| rs5030717 | 119513654 | TLR4  | A                | G        | 846                              | 1.00      | 592                  | 233  | 21   |                     |                     | N                 |           |
| rs5030718 | 119515646 | TLR4  | G                | A        | 847                              | 1.00      | 760                  | 85   | 2    | 1420                | 474 E>K             | N                 |           |
| rs5030719 | 119515756 | TLR4  | G                | T        | 845                              | 1.00      | 783                  | 62   | 0    | 1530                | 510 Q>H             | N                 |           |
| rs5030729 | 119514159 | TLR4  | A                | G        | 847                              | 1.00      | 556                  | 264  | 27   |                     |                     | N                 |           |
| rs5741880 | 12797336  | TLR7  | G                | T        | 844                              | 1.00      | 335                  | 214  | 295  |                     |                     | N                 |           |
| rs5741881 | 12816634  | TLR7  | A                | G        | 847                              | 1.00      | 593                  | 148  | 106  | 3087                | 1029 L>L            | N                 |           |
| rs5741883 | 12834141  | TLR8  | C                | T        | 845                              | 1.00      | 420                  | 201  | 224  |                     |                     | N                 |           |
| rs5741886 | 12844214  | TLR8  | T                | A        | 27                               | 0.03      | 6                    | 16   | 5    |                     |                     | N                 |           |
| rs5741887 | 12845918  | TLR8  | A                | T        | 846                              | 1.00      | 593                  | 133  | 120  |                     |                     | N                 |           |
| rs5743305 | 187226326 | TLR3  | T                | A        | 847                              | 1.00      | 430                  | 353  | 64   |                     |                     | N                 |           |
| rs5743309 | 187227338 | TLR3  | C                | A        | 839                              | 0.99      | 661                  | 152  | 26   |                     |                     | N                 |           |
| rs5743312 | 187237249 | TLR3  | C                | T        | 841                              | 0.99      | 674                  | 155  | 12   |                     |                     | N                 |           |
| rs5743315 | 187237409 | TLR3  | C                | A        | 845                              | 1.00      | 652                  | 178  | 15   |                     |                     | N                 |           |
| rs5743317 | 187240752 | TLR3  | T                | G        | 846                              | 1.00      | 743                  | 99   | 4    | 919                 | 307 Y>D             | N                 |           |
| rs5743712 | 12794906  | TLR7  | G                | C        | 846                              | 1.00      | 723                  | 76   | 47   |                     |                     | N                 |           |
| rs5743714 | 12794975  | TLR7  | C                | G        | 846                              | 1.00      | 780                  | 47   | 19   |                     |                     | N                 |           |
| rs5743716 | 12795356  | TLR7  | A                | C        | 844                              | 1.00      | 823                  | 13   | 8    |                     |                     | N                 |           |
| rs5743720 | 12797238  | TLR7  | T                | C        | 706                              | 0.83      | 541                  | 95   | 70   |                     |                     | N                 |           |
| rs5743728 | 12798622  | TLR7  | G                | A        | 844                              | 1.00      | 680                  | 102  | 62   |                     |                     | N                 |           |
| rs5743732 | 12799518  | TLR7  | C                | T        | 844                              | 1.00      | 769                  | 43   | 32   |                     |                     | N                 |           |
| rs5743735 | 12800164  | TLR7  | T                | C        | 846                              | 1.00      | 835                  | 7    | 4    |                     |                     | N                 |           |
| rs5743737 | 12800941  | TLR7  | A                | G        | 846                              | 1.00      | 739                  | 65   | 42   |                     |                     | N                 |           |
| rs5743740 | 12801880  | TLR7  | A                | G        | 843                              | 1.00      | 383                  | 220  | 240  |                     |                     | N                 |           |
| rs5743742 | 12802568  | TLR7  | C                | A        | 842                              | 0.99      | 761                  | 51   | 30   |                     |                     | N                 |           |
| rs5743750 | 12804747  | TLR7  | C                | T        | 846                              | 1.00      | 675                  | 112  | 59   |                     |                     | N                 |           |
| rs5743759 | 12807109  | TLR7  | T                | C        | 845                              | 1.00      | 825                  | 10   | 10   |                     |                     | N                 |           |
| rs5743763 | 12808213  | TLR7  | C                | A        | 845                              | 1.00      | 623                  | 142  | 80   |                     |                     | N                 |           |
| rs5743764 | 12808874  | TLR7  | G                | A        | 846                              | 1.00      | 833                  | 7    | 6    |                     |                     | N                 |           |
| rs5743771 | 12810835  | TLR7  | G                | A        | 845                              | 1.00      | 783                  | 39   | 23   |                     |                     | N                 |           |
| rs5743772 | 12811654  | TLR7  | A                | G        | 844                              | 1.00      | 769                  | 49   | 26   |                     |                     | N                 |           |
| rs5743776 | 12812465  | TLR7  | C                | T        | 841                              | 0.99      | 740                  | 72   | 29   |                     |                     | N                 |           |
| rs5743787 | 12818506  | TLR7  | T                | C        | 726                              | 0.86      | 712                  | 7    | 7    |                     |                     | N                 |           |
| rs5743849 | 52229755  | TLR9  | G                | A        | 842                              | 0.99      | 728                  | 110  | 4    |                     |                     | N                 |           |
| rs5744047 | 12839684  | TLR8  | A                | C        | 843                              | 1.00      | 685                  | 97   | 61   |                     |                     | N                 |           |
| rs5744054 | 12842641  | TLR8  | A                | T        | 803                              | 0.95      | 705                  | 67   | 31   |                     |                     | N                 |           |
| rs5744055 | 12842753  | TLR8  | A                | G        | 833                              | 0.98      | 634                  | 114  | 85   |                     |                     | N                 |           |
| rs5744067 | 12844893  | TLR8  | T                | C        | 845                              | 1.00      | 692                  | 95   | 58   |                     |                     | N                 |           |
| rs5744069 | 12845032  | TLR8  | T                | G        | 845                              | 1.00      | 452                  | 182  | 211  |                     |                     | N                 |           |
| rs5744072 | 12846252  | TLR8  | G                | A        | 843                              | 1.00      | 802                  | 28   | 13   |                     |                     | N                 |           |
| rs5744077 | 12847107  | TLR8  | A                | G        | 840                              | 0.99      | 674                  | 93   | 73   | 28                  | 10 M>V              | N                 |           |
| rs5744080 | 12847724  | TLR8  | T                | C        | 841                              | 0.99      | 579                  | 136  | 126  | 645                 | 215 H>H             | N                 |           |
| rs5744081 | 12848391  | TLR8  | C                | A        | 843                              | 1.00      | 592                  | 133  | 118  | 1312                | 438 R>R             | N                 |           |
| rs5744084 | 12849866  | TLR8  | C                | A        | 847                              | 1.00      | 681                  | 94   | 72   | 2787                | 929 I>I             | N                 |           |
| rs5744088 | 12850484  | TLR8  | G                | C        | 845                              | 1.00      | 705                  | 87   | 53   |                     |                     | N                 |           |
| rs625413  | 125669558 | TIRAP | C                | T        | 845                              | 1.00      | 751                  | 92   | 2    |                     |                     | N                 |           |
| rs6552950 | 187231849 | TLR3  | A                | G        | 844                              | 1.00      | 642                  | 193  | 9    |                     |                     | N                 |           |
| rs6767684 | 38160177  | MYD88 | G                | A        | 843                              | 1.00      | 306                  | 375  | 162  |                     |                     | N                 |           |
| rs6853    | 38159373  | MYD88 | A                | G        | 847                              | 1.00      | 387                  | 359  | 101  |                     |                     | N                 |           |
| rs7656411 | 154847104 | TLR2  | G                | T        | 844                              | 1.00      | 336                  | 399  | 109  |                     |                     | N                 |           |
| rs7657186 | 187231032 | TLR3  | G                | A        | 818                              | 0.97      | 508                  | 269  | 41   |                     |                     | N                 |           |
| rs7668666 | 187238285 | TLR3  | C                | A        | 843                              | 1.00      | 670                  | 159  | 14   |                     |                     | N                 |           |
| rs7744    | 38159024  | MYD88 | A                | G        | 847                              | 1.00      | 813                  | 34   | 0    |                     |                     | N                 |           |
| rs7864330 | 119509370 | TLR4  | T                | G        | 845                              | 1.00      | 588                  | 241  | 16   |                     |                     | N                 |           |
| rs7869402 | 119517852 | TLR4  | C                | T        | 840                              | 0.99      | 485                  | 301  | 54   |                     |                     | N                 |           |
| rs8177352 | 125659052 | TIRAP | A                | G        | 845                              | 1.00      | 774                  | 70   | 1    |                     |                     | N                 |           |
| rs8177375 | 125668273 | TIRAP | A                | G        | 844                              | 1.00      | 619                  | 205  | 20   |                     |                     | N                 |           |

| SNP       | Position  | Gene  | Ref. allele (A1) | SNP (A2) | Number of participants with call | Call rate | Genotype frequencies |      |      | SNP position on cds | Amino acid position | Amino acid change | Candidate |
|-----------|-----------|-------|------------------|----------|----------------------------------|-----------|----------------------|------|------|---------------------|---------------------|-------------------|-----------|
|           |           |       |                  |          |                                  |           | A1A1                 | A1A2 | A2A2 |                     |                     |                   |           |
| rs8177376 | 125668821 | TIRAP | T                | G        | 844                              | 1.00      | 709                  | 131  | 4    |                     |                     | N                 |           |
| rs850633  | 12818702  | TLR7  | G                | A        | 844                              | 1.00      | 547                  | 164  | 133  |                     |                     | N                 |           |
| rs864058  | 12815950  | TLR7  | G                | A        | 844                              | 1.00      | 520                  | 178  | 146  | 2403                | 801 T>T             | N                 |           |
| rs893629  | 154824417 | TLR2  | G                | A        | 824                              | 0.97      | 708                  | 111  | 5    |                     |                     | N                 |           |

SNP: dbsnp rs#

Position: Variant start position on chromosome.

Gene: Gene name in dbSNP.

Ref. allele (A1): Reference/wild-type allele.

SNP (A2): Observed allele

Number of participants with call: Total number of study participants for whom presence of SNP was determined.

Call rate: Proportion of all participants with successful call.

Genotype frequencies: Number of participants with each genotype.

SNP position on cds: SNP position on coding sequence, if the predicted function is coding.

Amino acid position: Position of the first amino acid (possibly) effected in the resultant peptide chain, if the predicted function is coding.

Amino acid change: Reference amino acid > variant amino acid.

Candidate: 'Y' indicates that SNP was included as a candidate SNP in this analysis.





|
