# Supplementary material
Source: PubMed Central journal article supplement (PMC3997584)
Supplement: supp_jit807_jit807supp_table2.pdf [file supp_jit807_jit807supp_table2.pdf]

Figure S1. Nested case-control study for selected HIV-1 infected cases and HIV-1 exposed seronegative controls from HIV-1 serodiscordant couples. Couples with HIV-1 transmission were matched to couples without transmission based on variables representing exposure to HIV-1, and 97 HIV-1 exposed seronegative individuals with the highest levels of HIV-1 risk (exposure) were also included.

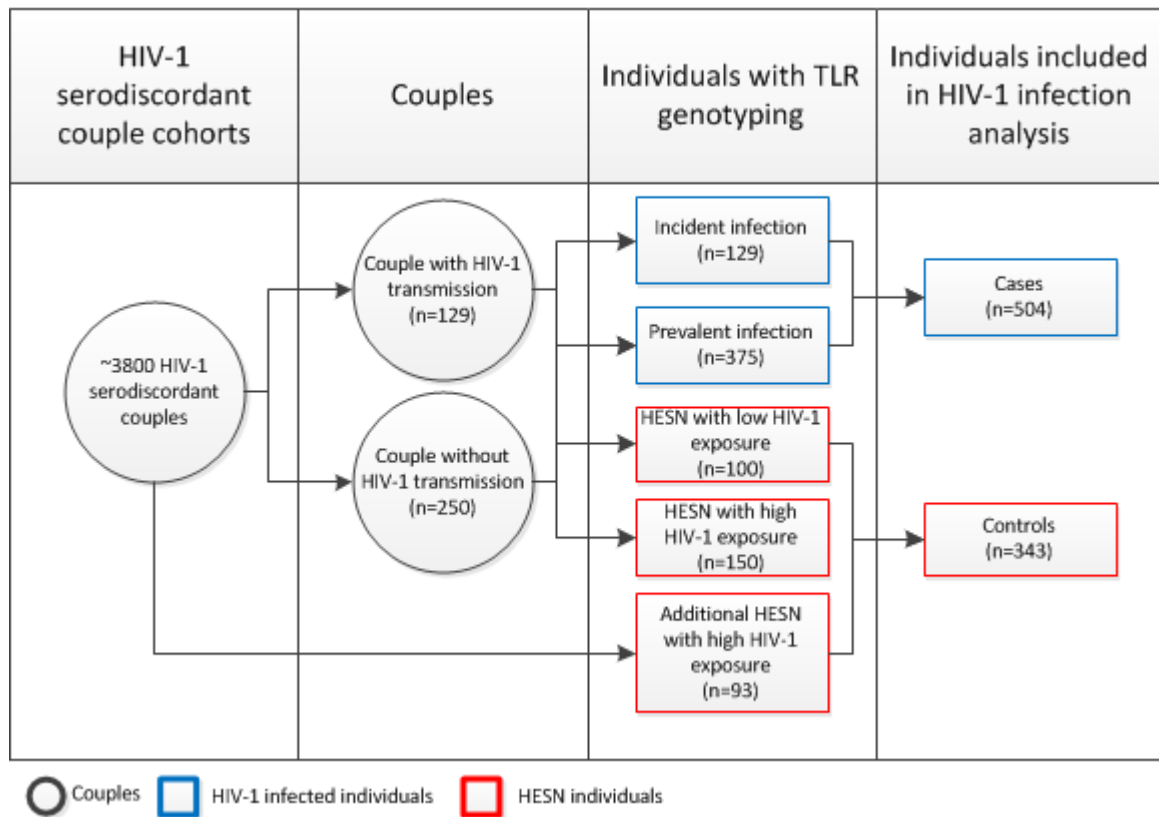

**Supplementary Table 2. Description of the cohort<sup>a</sup>**

|                                                     | Cases<br>Seroprevalent<br>(n=375) | Cases<br>Seroconverters<br>(n=129) | Controls<br>High exposure<br>(n=243) | Controls<br>Low exposure<br>(n=100) |
|-----------------------------------------------------|-----------------------------------|------------------------------------|--------------------------------------|-------------------------------------|
| <b>All participants</b>                             |                                   |                                    |                                      |                                     |
| East African                                        | 283 (76%)                         | 97 (75%)                           | 187 (79%)                            | 74 (74%)                            |
| Female                                              | 206 (55%)                         | 59 (46%)                           | 120 (50%)                            | 40 (40%)                            |
| Age (years)                                         | 32 (26-38)                        | 30 (25-37)                         | 30 (25-38)                           | 31 (26-38)                          |
| Male circumcision <sup>b</sup>                      | 47 (34%)                          | 30 (43%)                           | 38 (33%)                             | 24 (41%)                            |
| <b>HIV-1 seronegative at enrollment</b>             |                                   |                                    |                                      |                                     |
| Any unprotected sex with study partner <sup>c</sup> |                                   | 57 (44%)                           | 118 (50%)                            | 22 (22%)                            |
| HIV-1 exposure score <sup>d</sup>                   |                                   | 5 (3-5)                            | 5 (5-6)                              | 2 (1-3)                             |
| Follow-up months as seronegative                    |                                   | 9 (3-15)                           | 21 (15-24)                           | 21 (18-24)                          |
| <b>HIV-1 infected at enrollment</b>                 |                                   |                                    |                                      |                                     |
| Enrollment CD4+ count (cells/mm <sup>3</sup> )      | 419 (328-578)                     |                                    |                                      |                                     |
| Enrollment CD4<200                                  | 91 (24%)                          |                                    |                                      |                                     |
| Death during follow-up                              | 13 (4%)                           |                                    |                                      |                                     |
| <b>All HIV-1 seropositive cases</b>                 |                                   |                                    |                                      |                                     |
| HIV-1 RNA set-point (log <sub>10</sub> c/ml)        | 4.8 (4.4-5.3) <sup>e</sup>        | 4.5 (3.6-5) <sup>e</sup>           |                                      |                                     |
| Follow-up months with HIV-1                         | 22 (17-24)                        | 12 (12-12)                         |                                      |                                     |

a: Numbers (%) are provided for categorical variables and medians (inter-quartile ranges) are provided for continuous covariates.

b: Among men with data describing male circumcision status at study enrollment. Numbers and percentages may not sum to totals shown in table due to missing data.

c: Unprotected sex with study partner includes any acts reported by either partner during study follow-up. For couples with HIV-1 transmission, this only includes self-reports prior to the first evidence of infection.

d: HIV-1 exposure scores were estimated using Cox proportional hazards models on enrollment data and increased with increasing HIV-1 plasma RNA levels of the infected partner, increased frequency of unprotected sex, decreasing age, female gender, and lack of male circumcision as previously described [25,27].

e: For HIV-1 seroprevalent cases, set-point is defined as the mean plasma HIV-1 RNA level after excluding measurements taken at or after initiation of antiretroviral therapy (ART) or when CD4 count was <200 cells/mm<sup>3</sup>. For HIV-1 seroconverters, set-point is the average of all log<sub>10</sub> plasma HIV-1 RNA measurements taken 4-18 months after the estimated date of infection.
